# Supplementary material for: Finding the First Potential Inhibitors of Shikimate Kinase from Methicillin Resistant Staphylococcus aureus through Computer-Assisted Drug Design
Source: MDPI journal article supplement (doi:10.3390/molecules26216736), 2021-11-08
Supplement: s1 [file s1]

Table S1. Structures of the compounds selected for virtual screening.

| ZINC ID          | Name                                                                                                                                                        | Structure |
|------------------|-------------------------------------------------------------------------------------------------------------------------------------------------------------|-----------|
| ZINC000000033762 | 4-(1,2-dimethyl-3,5-dioxo-1,2,4-triazolidin-4-yl)benzenesulfonamide                                                                                         |           |
| ZINC000001663005 | (1 <i>R</i> ,2 <i>S</i> ,3 <i>R</i> )-1-(1,2,4-benzotriazin-3-yl)butane-1,2,3,4-tetrol                                                                      |           |
| ZINC000019594727 | 1,4,7,10,13,16-hexazacyclooctadecane                                                                                                                        |           |
| ZINC000039404119 | methyl 3-[bis(methylsulfonyl)amino]propanoate                                                                                                               |           |
| ZINC000090475824 | 1,2,4,5-Tetrazine, 3,6-bis(ethylsulfonyl)-                                                                                                                  |           |
| ZINC000863703032 | <i>N</i> -{(2 <i>R</i> )-1-[methoxy(methyl)amino]-1-oxopropan-2-yl}-1,3-dimethyl-2,4-dioxo-1,2,3,4-tetrahydropyrido[2,3- <i>d</i> ]pyrimidine-7-carboxamide |           |
| ZINC001156694532 | (4 <i>R</i> )-4-[[3-(piperazin-1-ylcarbonyl)pyridin-2-yl]amino]isoxazolidin-3-one                                                                           |           |

|                  |                                                                                                                                     |                                                                                       |
|------------------|-------------------------------------------------------------------------------------------------------------------------------------|---------------------------------------------------------------------------------------|
| ZINC000938450483 | <i>N</i> -[(3 <i>S</i> )-1-[(4 <i>S</i> )-2-oxoimidazolidin-4-yl]carbonyl]pyrrolidin-3-yl]-1 <i>H</i> -1,2,4-triazole-3-carboxamide | 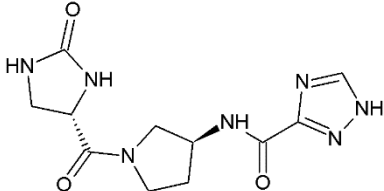   |
| ZINC000362648055 | (4 <i>S</i> ,4' <i>S</i> )-4,4'-[[6-(methylimino)-1,3,5-triazinane-2,4-diylidene]dinitrilo]dipyrrolidin-2-one                       |    |
| ZINC000852816657 | <i>N</i> -[2-(benzylamino)-2-oxoethyl]-3-hydroxyazetidine-3-carboxamide                                                             |    |
| ZINC000624224393 | (2 <i>R</i> )-3-[(4,6-diimino-1,3,5-triazinan-2-ylidene)amino]-2-(pyridin-3-yl)propan-1-ol                                          |   |
| ZINC000941661806 | 3-[(4-{1-[(2 <i>S</i> )-2-hydroxypropyl]azetidin-3-yl}piperazin-1-yl)carbonyl]pyrazine-2-carboxamide                                |  |
| ZINC000493041505 | (2 <i>Z</i> )-3-(1,3-dimethyl-2,4-dioxo-1,2,3,4-tetrahydropyrimidin-5-yl)- <i>N</i> -[2-(dimethylsulfamoyl)ethyl]prop-2-enamide     |  |
| ZINC000576768709 | (3 <i>R</i> ,4 <i>R</i> )-4-methoxy-1-[[6-(methylsulfonyl)pyridin-3-yl]sulfonyl]pyrrolidin-3-ol                                     |  |
| ZINC000262531716 | <i>N</i> -[2-(Methylamino)ethyl]-4-(3-oxopiperazin-1-yl)sulfonylbenzamide                                                           |  |

|                  |                                                                                                                                                                                        |  |
|------------------|----------------------------------------------------------------------------------------------------------------------------------------------------------------------------------------|--|
| ZINC001158970356 | (2 <i>R</i> ,3 <i>R</i> ,4 <i>R</i> ,5 <i>S</i> ,6 <i>R</i> )-6-(hydroxymethyl)-3-[(4-methoxypyridin-2-yl)amino]tetrahydro-2 <i>H</i> -pyran-2,4,5-triol                               |  |
| ZINC000353827182 | <i>N</i> -methyl- <i>N'</i> -[(3 <i>E</i> )-2-methyl-1,2-dihydro-3 <i>H</i> -1,2,4-triazol-3-ylidene]benzene-1,3-disulfonamide                                                         |  |
| ZINC000583151023 | <i>N</i> -{2-[(dimethylsulfamoyl)amino]ethyl}-1,3-dioxo-2,3-dihydro-1 <i>H</i> -isoindole-5-carboxamide                                                                                |  |
| ZINC000623936890 | <i>N</i> -(4,6-diimino-1,3,5-triazinan-2-ylidene)-1-[2-(morpholin-4-yl)ethyl]-1 <i>H</i> -pyrazol-4-amine                                                                              |  |
| ZINC001116751280 | 2-[[[6-bromo-5-methoxypyridin-3-yl)carbonyl]amino]propanediamide                                                                                                                       |  |
| ZINC001259045039 | <i>N</i> -(2-amino-2-oxoethyl)-2-[[2-(4,5-trifluorophenyl)sulfonyl]amino]acetamide                                                                                                     |  |
| ZINC000517234699 | 2-amino- <i>N</i> -(2-[[2-(dimethylamino)pyrimidin-5-yl]amino]-2-oxoethyl)acetamide                                                                                                    |  |
| ZINC001219697045 | (3 <i>aR</i> ,9 <i>bS</i> )- <i>N</i> -[2-(3-hydroxyazetidin-3-yl)ethyl]-5-oxo-2,3,3 <i>a</i> ,4,5,9 <i>b</i> -hexahydro-1 <i>H</i> -pyrrolo[3,4- <i>c</i> ]isoquinoline-8-carboxamide |  |

|                  |                                                                                                                                                       |                                                                                       |
|------------------|-------------------------------------------------------------------------------------------------------------------------------------------------------|---------------------------------------------------------------------------------------|
| ZINC001364199721 | 4-[3-(aminomethyl)pyrazin-2-yl]- <i>N</i> -methylpiperazine-1-sulfonamide                                                                             | 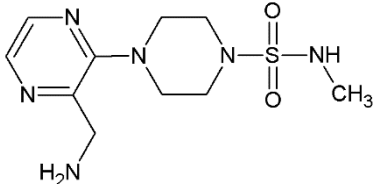   |
| ZINC000012322217 | 2,5,8-Trimethyl-1 <i>H</i> -dipyrrolo[3,4- <i>e</i> :3',4'- <i>g</i> ]isoindole-1,3,4,6,7,9(2 <i>H</i> ,5 <i>H</i> ,8 <i>H</i> )-hexone               |    |
| ZINC001329482875 | 2-[4-(2-hydroxyethyl)piperazin-1-yl]- <i>N</i> -methylethanesulfonamide                                                                               |    |
| ZINC001346492570 | (3 <i>S</i> )-3-hydroxy-1-[(5-hydroxypyridin-3-yl)acetyl]pyrrolidine-3-carboxamide                                                                    |    |
| ZINC000517602023 | (2 <i>R</i> )-3,3,3-trifluoro- <i>N,N</i> -dimethyl-2-[[ <i>(5E)</i> -1-methyl-1,2-dihydro-5 <i>H</i> -tetrazol-5-ylidene]amino]propane-1-sulfonamide |   |
| ZINC001423678455 | <i>N</i> -[dimethyl(oxido)-1 <sup>6</sup> -sulfanylidene]- <i>N'</i> -[2-(ethylsulfonyl)ethyl]sulfuric diamide                                        |  |
| ZINC000857210028 | 6-bromo-3-[2-(4,5-dihydro-1 <i>H</i> -imidazol-2-yl)hydrazinyl]-5-methoxy-2 <i>H</i> -indol-2-one                                                     |  |
| ZINC001168918857 | 1-{1-[4-(methylsulfonyl)pyridin-2-yl]-1 <i>H</i> -tetrazol-5-yl}methanamine                                                                           |  |

|                  |                                                                                                                                    |  |
|------------------|------------------------------------------------------------------------------------------------------------------------------------|--|
| ZINC001167923698 | 2-[(2-chloro-6,7-dihydro-5H-pyrrolo[3,4- <i>d</i> ]pyrimidin-4-yl)amino]-2-(hydroxymethyl)propane-1,3-diol                         |  |
| ZINC000972896897 | <i>N</i> -{ <i>trans</i> -3-[(pyridin-4-ylcarbonyl)amino]cyclobutyl}ethanediamide                                                  |  |
| ZINC001364023987 | <i>N</i> '-{[(3 <i>R</i> ,4 <i>R</i> )-4-hydroxytetrahydrofuran-3-yl]sulfamoyl}- <i>N,N</i> -dimethylmethanesulfonimidoamide       |  |
| ZINC000808047782 | (2 <i>S</i> )-3-[[2-amino-6-(1 <i>H</i> -pyrazol-1-yl)pyrimidin-4-yl]amino]-2-hydroxy- <i>N</i> -methylpropanamide                 |  |
| ZINC001363986270 | 3-[[[(dimethylamino)(methyl)oxido-1 <sup>6</sup> -sulfanylidene]sulfamoyl](methyl)amino]propanamide                                |  |
| ZINC000547286627 | (4 <i>E</i> )-4-[[2-(2 <i>S</i> )-2-sulfamoylpropyl]imino]-1,4-dihydropyridine-3-carboxamide                                       |  |
| ZINC001158867950 | 6-(6-methyl-2,6-diazaspiro[3.3]hept-2-yl)pyridazine-3-sulfonamide                                                                  |  |
| ZINC000425289994 | (1 <i>R</i> ,2 <i>R</i> ,1' <i>R</i> ,2' <i>R</i> )-2,2'-[[6-(methylimino)-1,3,5-triazinane-2,4-diylidene]dinitrilo]dicyclobutanol |  |

|                  |                                                                                                                                                       |                                                                                       |
|------------------|-------------------------------------------------------------------------------------------------------------------------------------------------------|---------------------------------------------------------------------------------------|
| ZINC000624085464 | 4-[[[(4,6-diimino-1,3,5-triazinan-2-ylidene)amino]methyl]- <i>N,N</i> -dimethylpyrimidin-2-amine                                                      | 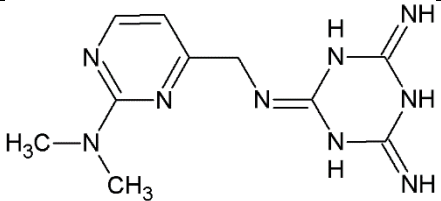   |
| ZINC001364169073 | (3 <i>R</i> )-3-[[[(4 <i>Z</i> )-1,2-dihydro-4 <i>H</i> -pyrazolo[3,4- <i>d</i> ]pyrimidin-4-ylideneamino]methyl]tetrahydrothiophene-3-ol 1,1-dioxide |    |
| ZINC001166935835 | 1-[2-(methylsulfonyl)-6,7,8,9-tetrahydro-5 <i>H</i> -pyrimido[4,5- <i>d</i> ]azepin-4-yl]azetidin-3-ol                                                |    |
| ZINC001118094695 | (2 <i>Z</i> )- <i>N</i> -[(2-amino-2-oxoethyl)sulfonyl]-3-[(2 <i>R</i> )-tetrahydrofuran-2-yl]prop-2-enamide                                          |   |
| ZINC000648129059 | <i>N</i> -[(2 <i>R</i> )-2-aminopropyl]-2-sulfamoylpyridine-4-carboxamide                                                                             |  |
| ZINC000005582647 | 4,7-dihydro-4,7-phenanthroline-1,2,3,8,9,10-hexone                                                                                                    |  |
| ZINC000002865127 | 1,5-dihydroxy-4,4,8,8-tetramethoxy-4 <i>H</i> ,8 <i>H</i> -[1,2,5]oxadiazolo[3,4- <i>f</i> ][2,1,3]benzoxadiazole-1,5-dium                            |  |
